# Supplementary material for: Molecular dynamics and Monte Carlo simulations for the structure of the aqueous trimethylammonium chloride solution in the 0.2–1 molar range
Source: Royal Society of Chemistry journal article supplement (doi:10.1039/c0cp02898c), 2011-01-01
Supplement: c0cp02898c.pdf [file c0cp02898c.pdf]

# **Molecular dynamics and Monte Carlo simulations for the structure of the aqueous trimethylammonium chloride solution in the 0.2-1 molar range**

Susanna Monti<sup>\* a</sup> and Peter I. Nagy<sup>b</sup>

<sup>a</sup> CNR -- National Research Council of Italy, Istituto di Chimica dei Composti Organo Metallici, (ICCOM), Area della Ricerca, via G. Moruzzi 1, I-56124 Pisa, Italy, e-mail: s.monti@iccom.cnr.it

<sup>b</sup> Center for Drug Design and Development, The University of Toledo, Toledo, OH, 43606-3390, e-mail: [pnagy@utnet.utoledo.edu](mailto:pnagy@utnet.utoledo.edu)

## **Table of Contents**

**Figure S1:** Radial Distribution Functions for case (1), about molar solution. Comparison of the different charge models.

**Figure S2:** N—O<sub>w</sub> Radial Distribution Functions for case (1) (blue), case (2) (black) and case (3) (red).

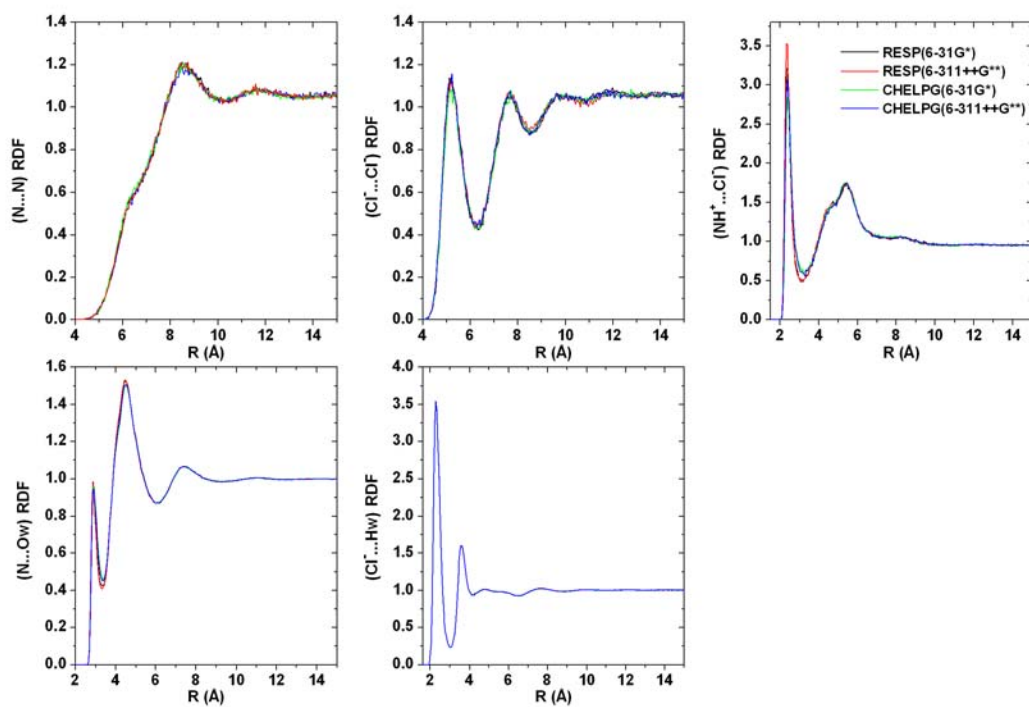

**Figure S1.** RDFs for case (1), about molar solution. Comparison of the different charge models.

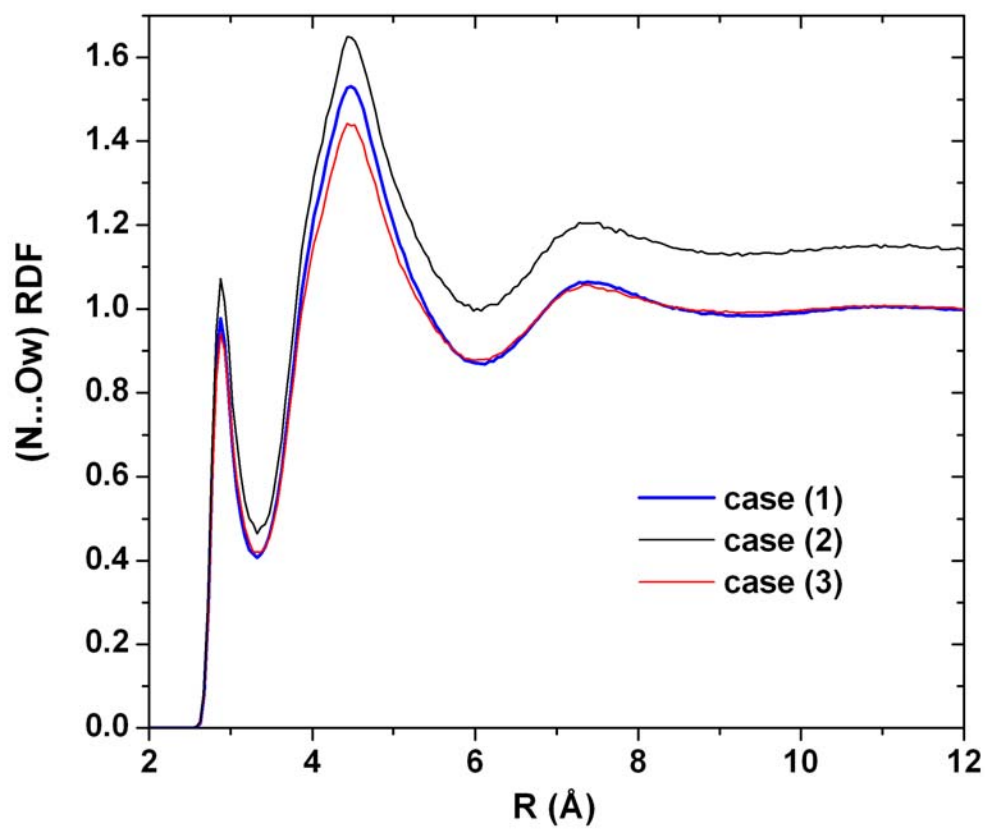

**Figure S2:** N—O<sub>w</sub> Radial Distribution Functions for case (1) (blue), case (2) (black) and case (3) (red).
